# Supplementary material for: Synthesis of porous In2O3 microspheres as a sensitive material for early warning of hydrocarbon explosions
Source: Royal Society of Chemistry journal article supplement (doi:10.1039/c4ra13763a), 2014-12-11
Supplement: c4ra13763a1.pdf [file c4ra13763a1.pdf]

Electronic Supplementary Information (ESI):

## **Synthesis of porous In<sub>2</sub>O<sub>3</sub> microspheres as sensitive materials for early warnings of hydrocarbon explosion**

Yang Cao<sup>a,‡</sup>, Jun Zhao<sup>a,c,‡</sup>, Xiaoxin Zou<sup>a</sup>, Pan-Pan Jin<sup>a</sup>, Hui Chen<sup>b</sup>, Ruiqin Gao<sup>a</sup>, Li-Jing Zhou<sup>a</sup>, Yong-Cun Zou\* and Guo-Dong Li<sup>a</sup>

<sup>a</sup>State Key Laboratory of Inorganic Synthesis and Preparative Chemistry, College of Chemistry, Jilin University, 2699 Qianjin Street, Changchun 130012, China E-mail: zouyc@jlu.edu.cn (Yong-Cun Zou)

<sup>b</sup>School of Materials Science and Engineering, China University of Mining and Technology, Xuzhou 221000, China

<sup>c</sup>College of Science, Hebei University of Science and Technology, Shijiazhuang 050018, China

‡ The authors contributed equally to this work.

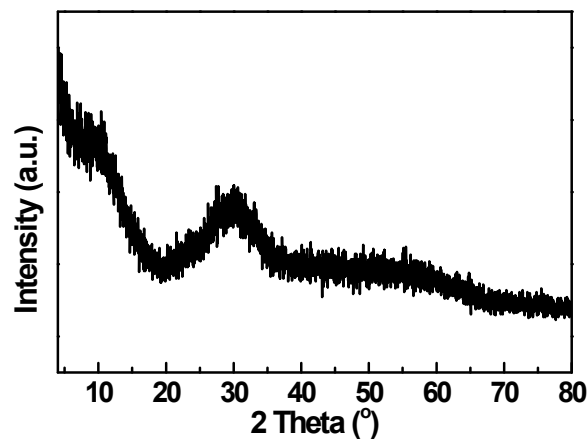

**Figure S1** XRD pattern of In-gly. The result demonstrates the In-gly precursor possesses an amorphous structure.

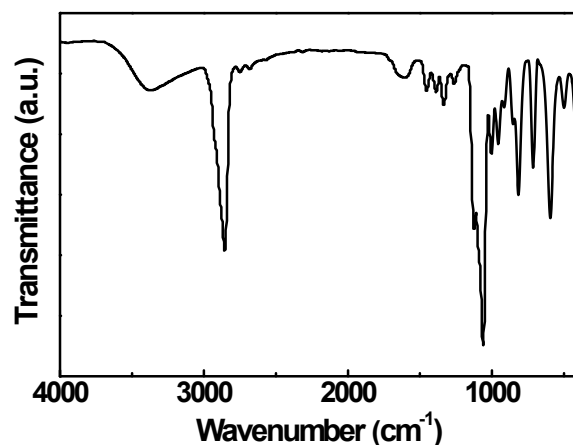

**Figure S2** IR spectrum of In-gly. The broad IR absorption band at  $\sim 3390\text{ cm}^{-1}$  is attributed to hydrogen-bound hydroxyl groups, and the absorption band at  $\sim 2850\text{ cm}^{-1}$  is characteristic of the C-H stretching vibrations. In addition, all the bands located below  $2000\text{ cm}^{-1}$  are generally assigned to In-O, C-C, C-C-O and C-O-In groups. Similar IR results were also observed previously for other metal alkoxides (Nanoscale, 2014, 6, 7255; Dalton Trans., 2013, 42, 4365; Dalton Trans., 2013, 42, 14357).

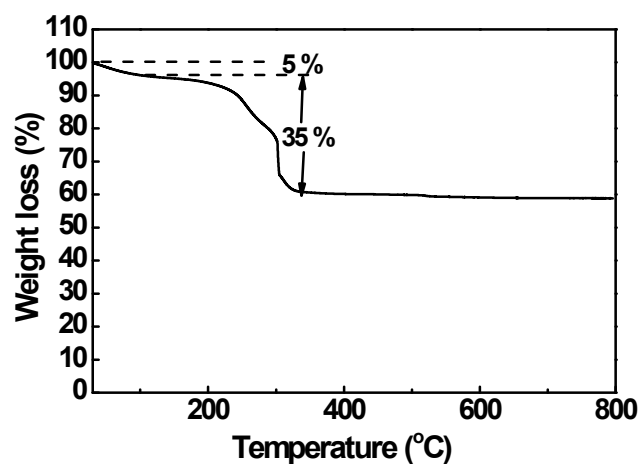

**Figure S3** TG curve of In-gly measured in air from 25 to 800 °C. Before 100 °C, the weight loss of 5% can be attributed to evaporation of the absorbed organic residues and water species on the In-gly surface. The In-gly precursor completely decomposed at around 350 °C with a total weight loss of ~35 %. From the weight loss values it is estimated that the indium content in the In-gly precursor is ~46.6 wt.%.

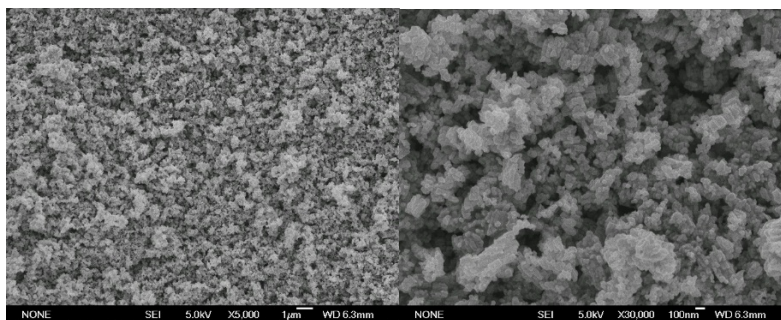

**Figure S4** SEM images of com-In<sub>2</sub>O<sub>3</sub>.
